# Supplementary material for: Strong Coupling between Biomineral Morphology and Sr/Ca of Arctica islandica (Bivalvia)—Implications for Shell Sr/Ca-Based Temperature Estimates
Source: MDPI journal article supplement (doi:10.3390/min12050500), 2022-04-19
Supplement: s1 [file s1]

## Supplementary materials

# Strong coupling between biomineral morphology and Sr/Ca of *Arctica islandica* (Bivalvia) — Implications for shell Sr/Ca-based temperature estimates

Cornélia Brosset, Nils Höche, Kotaro Shirai, Kozue Nishida, Regina Mertz-Kraus and Bernd R. Schöne

**Table S1.** Quality control data for  $^{88}\text{Sr}$  LA-ICP-MS measurements conducted on shells of *Arctica islandica*. NIST SRM 610 was used to calibrate the  $^{88}\text{Sr}$  concentrations of the shells. For each quality control material (QCM), the strontium-specific relative standard deviation (RSD%) from their respective preferred literature value ([71,72]) was calculated. conc. = concentration

| Average calibrated<br>$^{88}\text{Sr}$ conc. ( $\mu\text{g/g}$ ) | Average detection<br>limit $^{88}\text{Sr}$ ( $\mu\text{g/g}$ ) | QCM          | Average<br>$^{88}\text{Sr}$ conc. ( $\mu\text{g/g}$ ) | Literature<br>$^{88}\text{Sr}$ conc. ( $\mu\text{g/g}$ ) | RSD % |
|------------------------------------------------------------------|-----------------------------------------------------------------|--------------|-------------------------------------------------------|----------------------------------------------------------|-------|
| 515.60 $\pm$ 0.06                                                | 0.01 $\pm$ 0.01                                                 | NIST SRM 612 | 79.33 $\pm$ 0.21                                      | 78.4 $\pm$ 0.2                                           | 3.45  |
|                                                                  |                                                                 | BCR-2G       | 339.51 $\pm$ 0.93                                     | 342 $\pm$ 4                                              | 3.40  |
|                                                                  |                                                                 | MACS-3       | 7035.68 $\pm$ 111.72                                  | 6640 $\pm$ 170                                           | 3.61  |
|                                                                  |                                                                 | JCp-1        | 7221.04 $\pm$ 90.42                                   | 6890 $\pm$ 330                                           | 3.56  |
|                                                                  |                                                                 | JCt-1        | 1428.09 $\pm$ 28.08                                   | 1410 $\pm$ 50                                            | 3.47  |

**Table S2.** Sr/Ca ratios (mmol/mol) of laser spots covering annual growth lines from the three specimens of *Arctica islandica* examined in this study. HOM = homogeneous microstructure, CA = crossed-acicular microstructure.

| Specimen | Transect | Calendar year of growth line formation | Sr/Ca from annual growth lines (mmol/mol) |
|----------|----------|----------------------------------------|-------------------------------------------|
| A201L    | HOM      | 2003                                   | 1.98                                      |
|          |          | 2004                                   | 2.34                                      |
|          |          | 2005                                   | 1.99                                      |
|          | CA       | 2003                                   | 1.39                                      |
|          |          | 2004                                   | 1.11                                      |
|          |          | 2005                                   | 1.22                                      |
| A202L    | HOM      | 2003                                   | 2.21                                      |
|          |          | 2004                                   | 1.84                                      |
|          |          | 2005                                   | 1.76                                      |
|          | CA       | 2003                                   | 1.17                                      |
|          |          | 2004                                   | 1.33                                      |
|          |          | 2005                                   | 1.13                                      |
| A203L    | HOM      | 2004                                   | 1.75                                      |
|          |          | 2005                                   | 1.81                                      |
|          | CA       | 2004                                   | 1.15                                      |
|          |          | 2005                                   | 1.23                                      |
